# Supplementary material for: Rationale and design of the Web-basEd soCial media tecHnology to improvement in Adherence to dual anTiplatelet Therapy following Drug-Eluting Stent Implantation (WECHAT): protocol for a randomised controlled study
Source: PubMed Central journal article supplement — BMJ Open. 2020 Jan 7;10(1):e033017. doi: 10.1136/bmjopen-2019-033017 (PMC6955490; doi:10.1136/bmjopen-2019-033017), 2020-01-07
Supplement: bmjopen-2019-033017supp001.pdf [file bmjopen-2019-033017supp001.pdf]

## Supplement

Table1. Examples of messages

| Control Group                                                                                                                                                                                                                                                                                                                                                                                                     | Intervention Group (besides <i>social media messages</i> )                                                                                                                                                                                                                                                                                                                                                                                                                                                                                                                                                                                                                                                          |
|-------------------------------------------------------------------------------------------------------------------------------------------------------------------------------------------------------------------------------------------------------------------------------------------------------------------------------------------------------------------------------------------------------------------|---------------------------------------------------------------------------------------------------------------------------------------------------------------------------------------------------------------------------------------------------------------------------------------------------------------------------------------------------------------------------------------------------------------------------------------------------------------------------------------------------------------------------------------------------------------------------------------------------------------------------------------------------------------------------------------------------------------------|
| <p><i>Social media messages</i></p> <p>Severe atherosclerosis of the coronary artery results in an insufficient supply of blood to the coronary artery, leading to myocardial ischemia and hypoxia.</p> <p>People who are anxious in mental activity and engage less in physical work are susceptible to coronary heart disease.</p> <p>Smoking can increase the risk of coronary atherosclerosis and stroke.</p> | <p><i>Personalized reminder</i></p> <p>-For patients with diabetes</p> <p>-It is recommended that you check your blood glucose regularly.</p> <p>-Did your blood glucose meet the requirements today?</p> <p><i>Medication reminder</i></p> <p>-Aspirin helps to prevent plaque formation. Please taking aspirin once per day.</p> <p>-Did you take your antiplatelet drugs today?</p> <p><i>For patients with hypertension</i></p> <p>-Your blood pressure is a little high today; please continue to monitor it.</p> <p><i>Interactive responses (crawling the keywords)</i></p> <p>-Asked by users: What can people with coronary heart disease eat?</p> <p>-Auto-response: Eat: food with low salt and fat.</p> |

|  |                                                                                                                                                                                                           |
|--|-----------------------------------------------------------------------------------------------------------------------------------------------------------------------------------------------------------|
|  | <p>-Asked by users: How to deal with a stomach-ache after taking medicine</p> <p>-Auto-response: Stomach-ache: If there is an emergency, please go to the hospital for immediate treatment/first aid.</p> |
|--|-----------------------------------------------------------------------------------------------------------------------------------------------------------------------------------------------------------|

Table 2 Characteristics of randomized controlled trials with intervention to improve patients' lifestyle among patients with coronary heart disease

| Study                             | Desig<br>n | Duratio<br>n | Population               | Primary endpoint<br>& Secondary endpoint                                                                                                       | Experimental group<br>vs Control group                                                                                                                                                                                          |
|-----------------------------------|------------|--------------|--------------------------|------------------------------------------------------------------------------------------------------------------------------------------------|---------------------------------------------------------------------------------------------------------------------------------------------------------------------------------------------------------------------------------|
| Karla et al<br>2018 <sup>1</sup>  | RCT        | 3month<br>s  | 163 patients<br>with CHD | Drug adherence<br>( MMAS-8 score )<br>&Blood pressure<br>and cholesterol levels                                                                | <b>Intervention group</b><br>Basic APP:alarm<br>Advanced APP:record and snooze the<br>pause<br><b>Control group</b><br>-usual medical care                                                                                      |
| Salvi et al,<br>2018 <sup>2</sup> | RCT        | 24<br>months | 118 patients<br>with MI  | Education level about<br>heart-related health<br>improve more in the<br>intervention<br>groups(p=0.01).<br>Exercise habits<br>improved without | <b>Intervention group</b><br>-the mobile station: a wearable sensor<br>capable with app<br>-the patient station: feedback and<br>educational information<br>-the professional station: monitor<br>patients and generates alerts |

|                                        |     |          |                                                             |                                                                                               |                                                                                                                       |
|----------------------------------------|-----|----------|-------------------------------------------------------------|-----------------------------------------------------------------------------------------------|-----------------------------------------------------------------------------------------------------------------------|
|                                        |     |          |                                                             | statistical significance.                                                                     | <b>Control group</b>                                                                                                  |
|                                        |     |          |                                                             |                                                                                               | -receiving standard rehabilitation                                                                                    |
| Bravo-Escobar et al, 2018 <sup>3</sup> | RCT | 2 months | 28 patients with stable CHD at Moderate cardiovascular risk | Exercise time. & quality of life score                                                        | <b>Intervention group</b>                                                                                             |
|                                        |     |          |                                                             |                                                                                               | -hospital exercise once a week                                                                                        |
|                                        |     |          |                                                             |                                                                                               | -exercised at home following a program monitored with a remote electrocardiographic device                            |
|                                        |     |          |                                                             |                                                                                               | <b>Control group</b>                                                                                                  |
|                                        |     |          |                                                             |                                                                                               | -hospital exercise 3 times a week                                                                                     |
|                                        |     |          |                                                             |                                                                                               | -encourage to do exercise at home                                                                                     |
| Clara et al, 2016 <sup>4</sup>         | RCT | 6 months | 710 patients with CHD                                       | LDLC & Systolic blood pressure, body mass index (BMI), physical activity, and smoking status. | <b>Intervention group</b>                                                                                             |
|                                        |     |          |                                                             |                                                                                               | -TM providing lifestyle advice ,motivational reminders, and support to change lifestyle behaviors.(four times a week) |
|                                        |     |          |                                                             |                                                                                               | -usual medical care                                                                                                   |
|                                        |     |          |                                                             |                                                                                               | <b>Control group</b>                                                                                                  |

|                                |     |          |                       |                                                                                                                                     |                                                                                                                                                                                                                                                 |
|--------------------------------|-----|----------|-----------------------|-------------------------------------------------------------------------------------------------------------------------------------|-------------------------------------------------------------------------------------------------------------------------------------------------------------------------------------------------------------------------------------------------|
|                                |     |          |                       |                                                                                                                                     | -usual medical care                                                                                                                                                                                                                             |
| Linda et al, 2015 <sup>5</sup> | RCT | 30 days  | 90 patients with CHD  | There was no significant difference in the improvement as a function of the different treatment groups (F (2,6.24) =0.45, p=0.64).  | <p><b>TM Reminders+ TM Education group</b></p> <p>-two-way reminders messages on drug</p> <p>-one-way health messages</p> <p><b>TM Education group</b></p> <p>-one-way health messages</p> <p><b>Control group</b></p> <p>-Usual care/No TM</p> |
| Leila et al, 2015 <sup>6</sup> | RCT | 6 months | 123 patients with CHD | The intervention group reported significantly greater medication adherence score (mean difference: 0.58, 95% CI 0.19-0.97; P=.004). | <p><b>Intervention group</b></p> <p>-24 week text message program and access to website</p> <p>-Standard CR services</p> <p>-3-month phone call</p> <p><b>Control group</b></p> <p>-Standard CR services</p> <p>-3-month phone call</p>         |

|                                   |     |           |                                    |                                                                                                                                      |                                                                                                                                                                                                                                                                                                                                                     |
|-----------------------------------|-----|-----------|------------------------------------|--------------------------------------------------------------------------------------------------------------------------------------|-----------------------------------------------------------------------------------------------------------------------------------------------------------------------------------------------------------------------------------------------------------------------------------------------------------------------------------------------------|
| Vernooij et al, 2012 <sup>7</sup> | RCT | 12 months | 330 patients with atherosclerosis. | A relative change of -12% (-22% to -3%) in Framingham heart risk score for the intervention group compared with the usual care group | <p><b>Intervention group</b></p> <ul style="list-style-type: none"> <li>-Personalized website</li> <li>-Nurse reminder</li> </ul> <p><b>Usual care group</b></p> <ul style="list-style-type: none"> <li>-Usual care by doctor</li> </ul>                                                                                                            |
| Blasco et al, 2012 <sup>8</sup>   | RCT | 12 months | 203 patients with ACS              | Telemonitoring group experience improvement in cardiovascular risk factors profile than control patients (RR 1.4;95% CI 1.1-1.7)     | <p><b>Telemonitoring group</b></p> <ul style="list-style-type: none"> <li>-health data website</li> <li>-health recommendation messages</li> <li>-lifestyle counseling</li> <li>-usual-care treatment</li> </ul> <p><b>Control group</b></p> <ul style="list-style-type: none"> <li>-lifestyle counseling</li> <li>-usual-care treatment</li> </ul> |
| Reid et al, 2012 <sup>9</sup>     | RCT | 6 months  | 223 patients after PCI without     | Emotional (p<0.038) and physical (p<0.031) dimensions of                                                                             | <p><b>Intervention group</b></p> <ul style="list-style-type: none"> <li>-6-month online tutorials</li> <li>-feedback email</li> </ul>                                                                                                                                                                                                               |

|               |                           |                                          |
|---------------|---------------------------|------------------------------------------|
| enrolling in  | heart disease             | <b>Control group</b>                     |
| cardiac       | health-related quality of | -physical activity guidance from doctors |
| rehabilitatio | life were higher          | and book                                 |
| n.            |                           |                                          |
|               | in CardioFit group.       |                                          |

---

RCT=randomized controlled trial

TM=text messages

CR=cardiac rehabilitation

1. Santo K, Singleton A, Rogers K, *et al.* Medication reminder applications to improve adherence in coronary heart disease: a randomised clinical trial. *Heart*. 2018;10.1136/heartjnl-2018-313479
2. Salvi D, Ottaviano M, Muuraiskangas S, Martinez-Romero A, Vera-Munoz C, Triantafyllidis A, *et al.* An m-Health system for education and motivation in cardiac rehabilitation: the experience of HeartCycle guided exercise. *J Telemed Telecare*. 2018;24(4):303-16.
3. Bravo-Escobar R, Gonzalez-Represas A, Gomez-Gonzalez AM, *et al.* Effectiveness and safety of a home-based cardiac rehabilitation programme of mixed surveillance in patients with ischemic heart disease at moderate cardiovascular risk: A randomised, controlled clinical trial. *BMC Cardiovasc Disord*. 2017;17(1):66.
4. Chow CK, Redfern J, Hillis GS, *et al.* Effect of Lifestyle-Focused Text Messaging on Risk Factor Modification in Patients With

Coronary Heart Disease: A Randomized Clinical Trial. *JAMA*. 2015;314:1255-63.

5. Park LG, Howie-Esquivel J, Whooley MA, *et al*. Psychosocial factors and medication adherence among patients with coronary heart disease: A text messaging intervention. *Eur J Cardiovasc Nurs*. 2015;14:264-73.

6. Pfaeffli Dale L, Whittaker R, Jiang Y, *et al*. Text Message and Internet Support for Coronary Heart Disease Self-Management: Results From the Text4Heart Randomized Controlled Trial. *J Med Internet Res*. 2015;17:e237.

7. Vernooij JW, Kaasjager HA, van der Graaf Y, *et al*. Internet based vascular risk factor management for patients with clinically manifest vascular disease: randomised controlled trial. *BMJ*. 2012;344:e3750.

8. Blasco A, Carmona M, Fernandez-Lozano I, *et al*. Evaluation of a telemedicine service for the secondary prevention of coronary artery disease. *J Cardiopulm Rehabil Prev*. 2012;32:25-31.

9. Reid RD, Morrin LI, Beaton LJ, *et al*. Randomized trial of an internet-based computer-tailored expert system for physical activity in patients with heart disease. *Eur J Prev Cardiol*. 2012;19:1357-64.
